# Supplementary material for: Quantification of impurities in diatomite via sensitivity-improved calibration-free laser-induced breakdown spectroscopy
Source: Royal Society of Chemistry journal article supplement (doi:10.1039/d4ja00236a), 2024-01-01
Supplement: d4ja00236a3.pdf [file d4ja00236a3.pdf]

## Supporting Information:

### Quantification of impurities in diatomite via sensitivity-improved calibration-free laser-induced breakdown spectroscopy

Nabila Belkhir<sup>1,2</sup>, Sid Ahmed Beldjilali<sup>1, \*</sup>, Mohamed Amine Benelmouaz<sup>1</sup>, Saad Hamzaoui<sup>2</sup>, Anne-Patricia Alloncle<sup>3</sup>, Christoph Gerhard<sup>4</sup> and Jörg Hermann<sup>3</sup>

<sup>1</sup>Laboratoire de Physique des Plasmas, Matériaux Conducteurs et leurs Applications LPPMCA, Université des Sciences et de la Technologie d'Oran Mohamed Boudiaf USTO-MB, BP 1505 El M'naouer, 31000 Oran, Algeria

<sup>2</sup>Laboratoire de Microscopie Electronique & Sciences des Matériaux, Université des Sciences et de la Technologie d'Oran Mohamed Boudiaf USTO-MB, BP 1505 El M'naouer, 31000 Oran, Algeria

<sup>3</sup>Aix-Marseille University, CNRS, LP3, 13288 Marseille, France

<sup>4</sup>Fakultät für Ingenieurwissenschaften und Technik, Hochschule für angewandte Wissenschaft und Kunst, Von-Ossietzky-Straße 99, 37085 Göttingen, Germany

\*Corresponding author: sidahmed.beldjilali@univ-usto.dz

## Contents

|                     |     |
|---------------------|-----|
| List of Figures     | S-1 |
| 1. Measured spectra | S-2 |
| References          | S-3 |

## List of Figures

Fig. S1 Measured spectrum with a 400 ns delay and a 200 ns gate width. Data file: Measured spectrum with 400ns delay and 200ns gate width.txt . . . . .S-2

Fig. S2 Measured spectrum with a 1000 ns delay and a 500 ns gate width. Data file: Measured spectrum with 1000ns delay and 500ns gate width.txt . . . . . S-3

# 1. Measured spectra

The spectra were recorded with delays of the detector gate with respect to the laser pulse  $t_{delay} = 400$  ns (see Fig. S1) and 1000 ns (see Fig. S2). The gate width  $\Delta t_{gate}$  was chosen to  $\Delta t_{gate} = \frac{t_{delay}}{2}$  as a compromise between the smallest available variation of plasma properties during the time of observation and the highest reachable signal-to-noise ratio<sup>1</sup>. The data acquisition was performed by averaging over 480 ablation events, irradiating 160 sites on the sample surface with 3 laser pulses each. The sites were separated by a distance of 150  $\mu\text{m}$ .

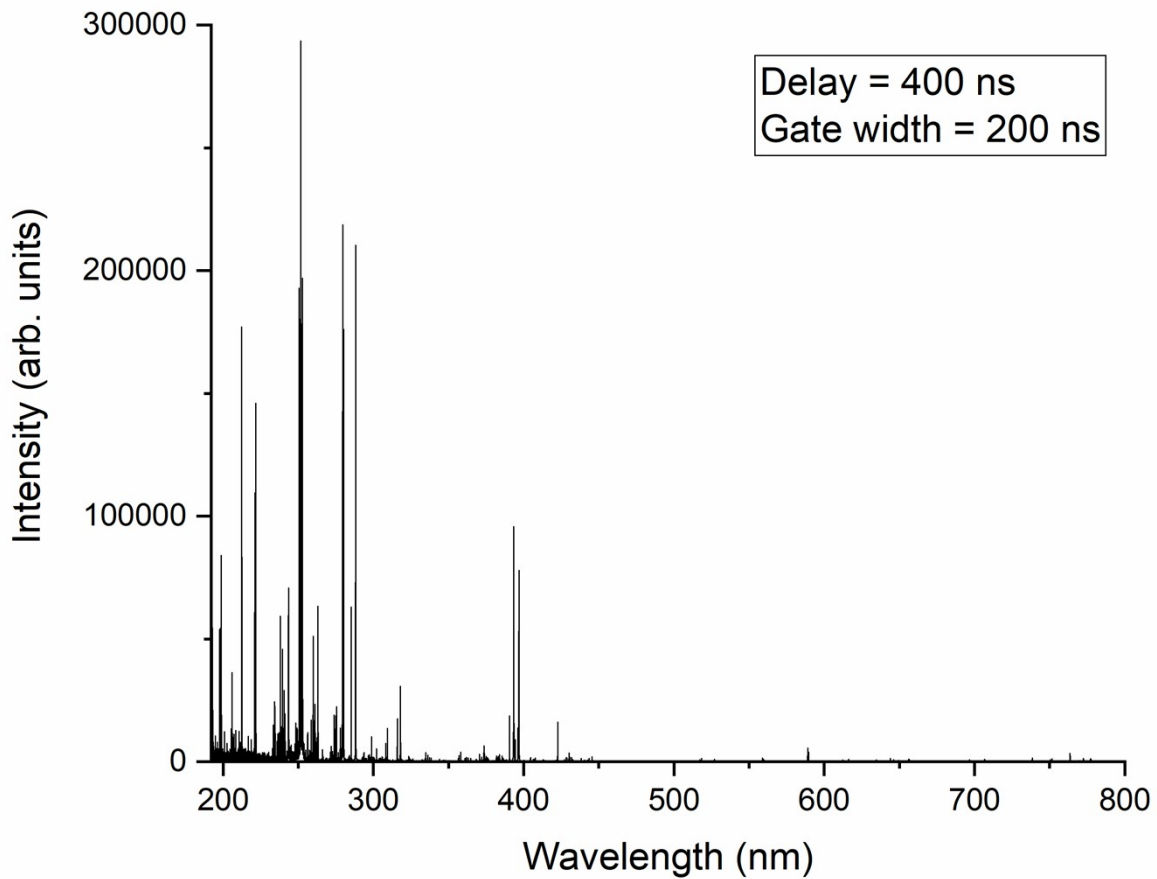

**Fig. S1** Measured spectrum with a 400 ns delay and a 200 ns gate width. Data file: Measured spectrum with 400ns delay and 200ns gate width.txt

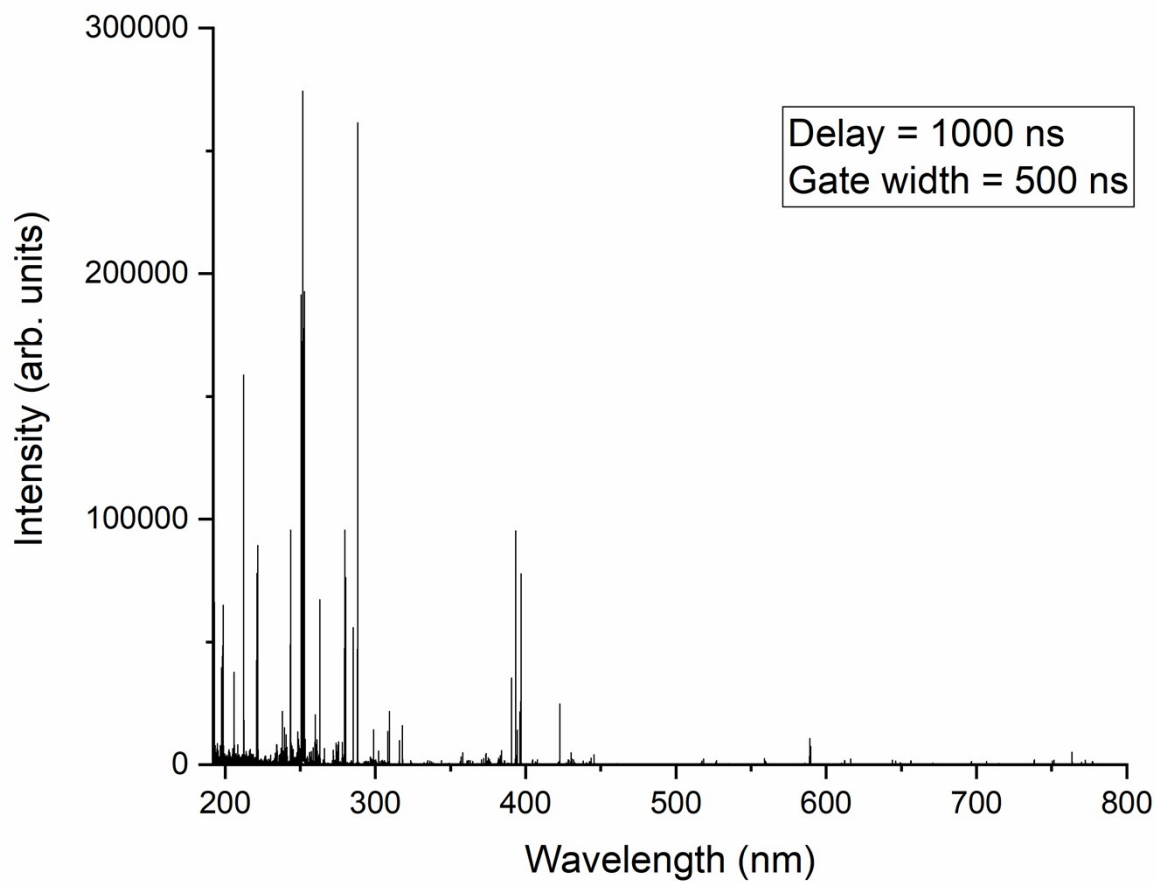

**Fig. S2** Measured spectrum with a 1000 ns delay and a 500 ns gate width. Data file: Measured spectrum with 1000ns delay and 500ns gate width.txt

## References

1. J. Hermann, *Laser Induced Breakdown Spectroscopy (LIBS) Concepts, Instrumentation, Data Analysis and Applications*, 2023, **1**, 89-121.
